# Supplementary material
Source: PubMed Central journal article supplement (PMC5609807)
Supplement: NIHMS906063-supplement-Nunes2016Supplement.pdf [file NIHMS906063-supplement-Nunes2016Supplement.pdf]

Supplementary Material

**HLA imputation in an admixed population: an assessment of the 1000 genomes data as a reference panel**

Kelly Nunes<sup>a</sup>, Xiuwen Zheng<sup>b</sup>, Margareth Torres<sup>c</sup>, Maria Elisa Moraes<sup>c</sup>, Bruno Z. Piovezan<sup>c</sup>, Gerlandia N. Pontes<sup>c</sup>, Lilian Kimura<sup>a</sup>, Juliana E.P. Carnavalli<sup>a</sup>, Regina C. Mingroni Netto<sup>a</sup>, Diogo Meyer<sup>a</sup>

TABLES – Supplementary Material

**Table S1.** QUI Sample description: communities and sample size.

| Quilombo communities | Sample size |
|----------------------|-------------|
| Abobral              | 59          |
| André Lopes          | 41          |
| Galvão               | 24          |
| Ivaporanduva         | 30          |
| Maria Rosa           | 09          |
| Nhanguara            | 31          |
| Pedro Cubas          | 35          |
| Pilões               | 21          |
| Poças                | 26          |
| Reginaldo            | 28          |
| São Pedro            | 23          |
| Sapatu               | 38          |
| Total                | 365*        |

\* Lemes et al. (2014) showed that the levels of substructure of those *quilombo* communities are very small, therefore, the set of communities here reported can be considered as a single population aggregate.

**Table S2.** 1000g Sample description: population, population origin and sample size.

| Population                                                               | Population Origin | Sample size |
|--------------------------------------------------------------------------|-------------------|-------------|
| Luhya from Webuye, Kenya (LWK)                                           | African           | 87          |
| Yoruba from Ibadan, Nigeria (YRI)                                        | African           | 39          |
| British from England and Scotland, UK (GRB)                              | European          | 89          |
| Finnish, Finland (FIN)                                                   | European          | 93          |
| Northern and Western European from Utah, USA (CEU)                       | European          | 45          |
| Italian from Tuscany, Italy (TSI)                                        | European          | 90          |
| Han from south, China (CHS)                                              | East Asian        | 100         |
| Han Chinese from Beijing, China (CHB) + Japanese from Tokyo, Japan (JPT) | East Asian        | 165         |
| African Ancestry from Southwest, USA (ASW)                               | Admixed           | 53          |
| Colombian from Medellin, Colombia (CLM)                                  | Admixed           | 60          |
| Mexican Ancestry from Los Angeles California, USA (MXL)                  | Admixed           | 55          |
| Puerto Rican, Puerto Rico (PUR)                                          | Admixed           | 55          |
| <b>TOTAL</b>                                                             |                   | <b>931</b>  |

**Table S3.** UW\_2014 Sample description: population, population origin and sample size.

| Dataset | Population  | Population Origin | Sample size |
|---------|-------------|-------------------|-------------|
| HAPMAP  | Yoruban     | African           | 30          |
|         | CEU         | European          | 30          |
|         | Han Chinese | Asian             | 45          |
|         | Japan       | Asian             | 45          |
| HLARES  | African     | African           | 173         |
|         | European    | European          | 2668        |
|         | Asian       | Asian             | 720         |
|         | Hispanic    | Admixed           | 439         |

**Table S4. Imputation models characteristics**

| <b>1000g</b>                           | 1-field | 2-fields | 1-field | 2-fields | 1-field | 2-fields | 1-field | 2-fields |
|----------------------------------------|---------|----------|---------|----------|---------|----------|---------|----------|
| Individuals in training panel          | 931     | 931      | 931     | 931      | 931     | 931      | 931     | 931      |
| HLA alleles in training panel          | 20      | 54       | 36      | 103      | 17      | 36       | 13      | 52       |
| SNPs in training panel                 | 249     | 249      | 401     | 401      | 456     | 456      | 395     | 395      |
| <i>Quilombo</i> samples with known HLA | 146     | 146      | 146     | 146      | 144     | 144      | 146     | 146      |
| <b>1000g+QUI</b>                       |         |          |         |          |         |          |         |          |
| Individuals in training panel          | 988     | 988      | 988     | 988      | 986     | 986      | 988     | 988      |
| HLA alleles in training panel          | 20      | 58       | 36      | 105      | 17      | 37       | 13      | 52       |
| SNPs in training panel                 | 245     | 245      | 397     | 397      | 451     | 451      | 379     | 379      |
| <i>Quilombo</i> samples with known HLA | 89*     | 89*      | 89*     | 89*      | 89*     | 89*      | 89*     | 89*      |
| <b>UW</b>                              |         |          |         |          |         |          |         |          |
| Individuals in training panel          | 3090    | 2901     | 3977    | 3886     | 3102    | 2916     | 3905    | 3713     |
| HLA alleles in training panel          | 25      | 83       | 35      | 142      | 14      | 49       | 13      | 79       |
| SNPs in training panel                 | 143     | 143      | 176     | 176      | 192     | 192      | 125     | 125      |
| <i>Quilombo</i> samples with known HLA | 146     | 146      | 146     | 146      | 144     | 144      | 146     | 146      |
| <b>1000g_UW_shared_SNPs</b>            |         |          |         |          |         |          |         |          |
| Individuals in training panel          | 931     | 931      | 931     | 931      | 931     | 931      | 931     | 931      |
| HLA alleles in training panel          | 20      | 54       | 36      | 103      | 17      | 36       | 13      | 52       |
| SNPs in training panel                 | 101     | 101      | 174     | 174      | 190     | 190      | 125     | 125      |
| <i>Quilombo</i> samples with known HLA | 146     | 146      | 146     | 146      | 144     | 144      | 146     | 146      |

- Without overlapping sample (146 QUI – 57 unrelated QUI = 89 samples)

**Table S5. Number of samples with maximum kinship coefficient with any sample in the other subset in the specified range**

| Kinship coefficient | 57 subset | 89 subset |
|---------------------|-----------|-----------|
| <1/32               | 22        | 29        |
| 1/32 ≤ 1/16         | 21        | 41        |
| 1/16 ≤ <1/8         | 7         | 11        |
| 1/8 ≤ 1/4           | 4         | 5         |
| ≥1/4                | 3         | 3         |
| <b>Total</b>        | <b>57</b> | <b>89</b> |

Table S6. Model accuracy by posterior probability threshold for HLA allele imputation two-fields (4 digits).

| Post prob                     | HLA-A |          | HLA-B |          | HLA-C |          | HLA-DRB1 |          |
|-------------------------------|-------|----------|-------|----------|-------|----------|----------|----------|
|                               | N     | Accuracy | N     | Accuracy | N     | Accuracy | N        | Accuracy |
| 1000g (two-fields resolution) |       |          |       |          |       |          |          |          |
| >10                           | 146   | 82.9     | 144   | 82.3     | 144   | 94.8     | 146      | 86.6     |
| >20                           | 146   | 82.9     | 132   | 83.7     | 144   | 94.8     | 144      | 87.9     |
| >30                           | 141   | 84.0     | 116   | 84.9     | 141   | 95.0     | 132      | 89.8     |
| >40                           | 138   | 84.4     | 97    | 88.7     | 134   | 96.3     | 115      | 93.0     |
| >50                           | 130   | 86.5     | 85    | 90.0     | 130   | 96.2     | 101      | 94.1     |
| >60                           | 122   | 87.3     | 68    | 90.4     | 124   | 96.4     | 91       | 94.5     |
| >70                           | 96    | 94.8     | 53    | 90.1     | 111   | 96.8     | 70       | 97.8     |
| >80                           | 87    | 95.4     | 40    | 90.0     | 105   | 97.5     | 63       | 99.2     |
| >90                           | 60    | 94.4     | 23    | 91.3     | 79    | 97.5     | 40       | 98.8     |
| 1000g+QUI                     |       |          |       |          |       |          |          |          |
| >10                           | 146   | 84.6     | 144   | 83.3     | 144   | 95.1     | 146      | 86.6     |
| >20                           | 146   | 84.6     | 132   | 84.5     | 144   | 95.1     | 141      | 87.9     |
| >30                           | 141   | 86.2     | 116   | 85.3     | 141   | 95.4     | 132      | 89.8     |
| >40                           | 138   | 86.6     | 97    | 88.6     | 136   | 96.3     | 115      | 93.5     |
| >50                           | 131   | 88.5     | 85    | 90.0     | 130   | 96.1     | 101      | 94.5     |
| >60                           | 122   | 88.9     | 68    | 89.7     | 124   | 96.4     | 91       | 95.0     |
| >70                           | 97    | 95.9     | 53    | 90.1     | 111   | 96.8     | 70       | 97.8     |
| >80                           | 88    | 96.0     | 40    | 90.0     | 105   | 97.6     | 63       | 99.2     |
| >90                           | 61    | 95.1     | 23    | 91.3     | 79    | 97.5     | 40       | 98.7     |
| UW                            |       |          |       |          |       |          |          |          |
| >10                           | 146   | 84.2     | 145   | 65.9     | 144   | 86.8     | 145      | 78.3     |
| >20                           | 144   | 85.1     | 118   | 72.5     | 142   | 87.3     | 130      | 81.5     |
| >30                           | 136   | 87.5     | 99    | 77.8     | 135   | 88.5     | 114      | 85.9     |
| >40                           | 132   | 89.0     | 81    | 84.6     | 118   | 92.4     | 98       | 90.3     |
| >50                           | 126   | 89.3     | 63    | 90.5     | 116   | 92.7     | 83       | 92.2     |
| >60                           | 121   | 90.1     | 50    | 92.0     | 109   | 94.5     | 71       | 94.4     |
| >70                           | 111   | 90.1     | 40    | 91.2     | 94    | 95.2     | 59       | 94.9     |
| >80                           | 94    | 92.5     | 25    | 94.0     | 73    | 95.6     | 51       | 95.1     |
| >90                           | 72    | 94.4     | 18    | 94.4     | 61    | 96.7     | 37       | 97.3     |

Table S7. Test of non-independence of imputation accuracy across HLA loci pairs. The p-values were obtained using a Fisher Exact test.

| <b>Locus pair</b>      | <b>p-value (Fisher test)</b> |
|------------------------|------------------------------|
| <b>HLA-A and -B</b>    | 0.64                         |
| <b>HLA-A and -C</b>    | 0.49                         |
| <b>HLA-A and -DRB1</b> | 0.05                         |
| <b>HLA-B and -C</b>    | 0.0001                       |
| <b>HLA-B and -DRB1</b> | 0.38                         |
| <b>HLA-C and -DRB1</b> | 0.44                         |





|       |    |        |       |       |       |       |       |       |             |
|-------|----|--------|-------|-------|-------|-------|-------|-------|-------------|
| 3:03  | 4  | 0.0139 | 100.0 | 98.6  | 100.0 | 98.6  | 50.0  | 100.0 | --          |
| 3:04  | 30 | 0.1042 | 100.0 | 97.9  | 86.7  | 99.2  | 92.9  | 98.5  | 03:03 (100) |
| 4:01  | 46 | 0.1597 | 100.0 | 99.7  | 100.0 | 99.6  | 97.9  | 100.0 | --          |
| 4:13  | 1  | 0.0035 | 100.0 | 99.7  | 0.0   | 100.0 | --    | 99.7  | 04:01 (100) |
| 5:01  | 14 | 0.0486 | 100.0 | 100.0 | 100.0 | 100.0 | 100.0 | 100.0 | --          |
| 6:02  | 9  | 0.0312 | 100.0 | 100.0 | 100.0 | 100.0 | 100.0 | 100.0 | --          |
| 7:01  | 23 | 0.0799 | 100.0 | 99.7  | 100.0 | 99.6  | 95.8  | 100.0 | --          |
| 7:02  | 17 | 0.0590 | 100.0 | 100.0 | 100.0 | 100.0 | 100.0 | 100.0 | --          |
| 7:04  | 2  | 0.0069 | 100.0 | 100.0 | 100.0 | 100.0 | 100.0 | 100.0 | --          |
| 8:02  | 13 | 0.0451 | 100.0 | 99.7  | 92.3  | 100.0 | 100.0 | 99.6  | 03:04 (100) |
| 8:04  | 3  | 0.0104 | 100.0 | 100.0 | 100.0 | 100.0 | 100.0 | 100.0 | --          |
| 12:02 | 2  | 0.0069 | 100.0 | 100.0 | 100.0 | 100.0 | 100.0 | 100.0 | --          |
| 12:03 | 10 | 0.0347 | 100.0 | 100.0 | 100.0 | 100.0 | 100.0 | 100.0 | --          |
| 14:02 | 5  | 0.0174 | 100.0 | 100.0 | 100.0 | 100.0 | 100.0 | 100.0 | --          |
| 15:02 | 5  | 0.0174 | 100.0 | 98.3  | 100.0 | 98.2  | 50.0  | 100.0 | --          |
| 15:04 | 1  | 0.0035 | 100.0 | 99.7  | 0.0   | 100.0 | --    | 99.7  | 15:02 (100) |
| 15:39 | 3  | 0.0104 | 100.0 | 99.0  | 0.0   | 100.0 | --    | 99.0  | 15:02 (100) |
| 16:01 | 21 | 0.0729 | 100.0 | 100.0 | 100.0 | 100.0 | 100.0 | 100.0 | --          |
| 16:02 | 1  | 0.0035 | 100.0 | 99.7  | 0.0   | 100.0 | --    | 99.7  | 15:02 (100) |
| 17:01 | 39 | 0.1354 | 100.0 | 99.3  | 94.9  | 100.0 | 100.0 | 99.2  | 03:04 (50)  |
| 18:01 | 2  | 0.0069 | 100.0 | 100.0 | 100.0 | 100.0 | 100.0 | 100.0 | --          |

---

HLA-DRB1

|       |    |        |       |       |       |       |       |       |             |
|-------|----|--------|-------|-------|-------|-------|-------|-------|-------------|
| 1:01  | 14 | 0.0479 | 100.0 | 100.0 | 100.0 | 100.0 | 100.0 | 100.0 | --          |
| 1:02  | 23 | 0.0788 | 100.0 | 100.0 | 100.0 | 100.0 | 100.0 | 100.0 | --          |
| 3:01  | 11 | 0.0377 | 100.0 | 98.6  | 90.9  | 98.9  | 76.9  | 99.6  | 12:01 (50)  |
| 3:02  | 17 | 0.0582 | 100.0 | 100.0 | 100.0 | 100.0 | 100.0 | 100.0 | --          |
| 4:01  | 4  | 0.0137 | 100.0 | 97.9  | 0.0   | 99.3  | 0.0   | 98.6  | 04:05 (75)  |
| 4:02  | 3  | 0.0103 | 100.0 | 100.0 | 100.0 | 100.0 | 100.0 | 100.0 | --          |
| 4:04  | 2  | 0.0068 | 100.0 | 99.7  | 100.0 | 99.7  | 66.7  | 100.0 | --          |
| 4:05  | 1  | 0.0034 | 100.0 | 99.0  | 100.0 | 99.0  | 25.0  | 100.0 | --          |
| 4:11  | 3  | 0.0103 | 100.0 | 99.0  | 0.0   | 100.0 | --    | 99.0  | ... (100)   |
| 7:01  | 34 | 0.1164 | 100.0 | 98.6  | 88.2  | 100.0 | 100.0 | 98.5  | 04:01 (25)  |
| 8:01  | 3  | 0.0103 | 100.0 | 100.0 | 100.0 | 100.0 | 100.0 | 100.0 | --          |
| 8:02  | 9  | 0.0308 | 100.0 | 99.0  | 100.0 | 98.9  | 75.0  | 100.0 | --          |
| 8:04  | 25 | 0.0856 | 100.0 | 98.6  | 88.0  | 99.6  | 95.7  | 98.9  | 08:02 (67)  |
| 9:01  | 1  | 0.0034 | 100.0 | 99.7  | 0.0   | 100.0 | --    | 99.7  | 04:01 (100) |
| 10:01 | 3  | 0.0103 | 100.0 | 99.7  | 100.0 | 99.7  | 75.0  | 100.0 | --          |
| 11:01 | 27 | 0.0925 | 100.0 | 96.2  | 96.3  | 96.2  | 72.2  | 99.6  | 03:01 (100) |
| 11:02 | 9  | 0.0308 | 100.0 | 99.0  | 88.9  | 99.3  | 80.0  | 99.6  | 08:04 (100) |
| 11:04 | 7  | 0.0240 | 100.0 | 97.6  | 0.0   | 100.0 | --    | 97.6  | 11:01 (100) |
| 12:01 | 11 | 0.0377 | 100.0 | 98.6  | 100.0 | 98.6  | 73.3  | 100.0 | --          |
| 12:02 | 2  | 0.0068 | 100.0 | 99.3  | 0.0   | 100.0 | --    | 99.3  | 03:01 (100) |
| 13:01 | 15 | 0.0514 | 100.0 | 99.3  | 100.0 | 99.3  | 88.2  | 100.0 | --          |
| 13:02 | 7  | 0.0240 | 100.0 | 99.7  | 85.7  | 100.0 | 100.0 | 99.7  | 13:01 (100) |
| 13:04 | 4  | 0.0137 | 100.0 | 98.6  | 0.0   | 100.0 | --    | 98.6  | 11:01 (50)  |
| 13:05 | 1  | 0.0034 | 100.0 | 99.7  | 0.0   | 100.0 | --    | 99.7  | 11:01 (100) |



|       |    |        |       |       |       |       |       |       |             |
|-------|----|--------|-------|-------|-------|-------|-------|-------|-------------|
| 14:01 | 4  | 0.0137 | 100.0 | 100.0 | 100.0 | 100.0 | 100.0 | 100.0 | --          |
| 14:02 | 3  | 0.0103 | 100.0 | 99.0  | 0.0   | 100.0 | --    | 99.0  | 12:01 (67)  |
| 14:06 | 1  | 0.0034 | 100.0 | 99.7  | 0.0   | 100.0 | --    | 99.7  | 12:01 (100) |
| 15:01 | 13 | 0.0445 | 100.0 | 99.3  | 100.0 | 99.3  | 86.7  | 100.0 | --          |
| 15:03 | 31 | 0.1062 | 100.0 | 99.0  | 93.5  | 99.6  | 96.7  | 99.2  | 15:01 (100) |
| 16:02 | 4  | 0.0137 | 100.0 | 100.0 | 100.0 | 100.0 | 100.0 | 100.0 | --          |

<sup>1</sup>: the HLA alleles with more than one copy and non-zero sensitivity in the training are listed. <sup>[[12]]</sup><sub>SEP</sub>: CR – call rate. <sup>[[13]]</sup><sub>SEP</sub>: ACC – allele accuracy. <sup>[[14]]</sup><sub>SEP</sub>: the most likely miscalled allele and the proportion of the most likely miscalled allele in all miscalled alleles.

S9. The sensitivity (SEN), specificity (SPE), positive predictive value (PPV) and negative predictive value (NPV) calculated from validation samples for each four-digit HLA allele to 1000g+QUI model.

| Allele1  | Num.   | Freq.  | CR2   | ACC3  | SEN   | SPE   | PPV   | NPV   | Miscall4    |
|----------|--------|--------|-------|-------|-------|-------|-------|-------|-------------|
|          | Valid. | Valid. | (%)   | (%)   | (%)   | (%)   | (%)   | (%)   | (%)         |
| HLA-A    |        |        |       |       |       |       |       |       |             |
| 1:01     | 7      | 0.0393 | 100.0 | 97.8  | 42.9  | 100.0 | 100.0 | 97.7  | 36:01 (75)  |
| 1:03     | 8      | 0.0449 | 100.0 | 100.0 | 100.0 | 100.0 | 100.0 | 100.0 | --          |
| 2:01     | 21     | 0.1180 | 100.0 | 98.9  | 95.2  | 99.4  | 95.2  | 99.4  | ... (100)   |
| 2:02     | 3      | 0.0169 | 100.0 | 100.0 | 100.0 | 100.0 | 100.0 | 100.0 | --          |
| 2:05     | 1      | 0.0056 | 100.0 | 99.4  | 0.0   | 100.0 | --    | 99.4  | 02:05 (100) |
| 2:05     | 1      | 0.0056 | 100.0 | 99.4  | 100.0 | 99.4  | 50.0  | 100.0 | --          |
| 2:11     | 1      | 0.0056 | 100.0 | 99.4  | 0.0   | 100.0 | --    | 99.4  | ... (100)   |
| 3:01     | 17     | 0.0955 | 100.0 | 98.9  | 100.0 | 98.8  | 89.5  | 100.0 | --          |
| 11:01    | 5      | 0.0281 | 100.0 | 100.0 | 100.0 | 100.0 | 100.0 | 100.0 | --          |
| 23:01    | 26     | 0.1461 | 100.0 | 98.3  | 100.0 | 98.0  | 89.7  | 100.0 | --          |
| 23:05    | 3      | 0.0169 | 100.0 | 98.3  | 0.0   | 100.0 | --    | 98.3  | 23:01 (100) |
| 24:02:00 | 10     | 0.0562 | 100.0 | 100.0 | 100.0 | 100.0 | 100.0 | 100.0 | --          |
| 26:01:00 | 4      | 0.0225 | 100.0 | 94.9  | 100.0 | 94.8  | 30.8  | 100.0 | --          |
| 26:08:00 | 3      | 0.0169 | 100.0 | 98.3  | 0.0   | 100.0 | --    | 98.3  | 26:01 (100) |
| 29:02:00 | 7      | 0.0393 | 100.0 | 100.0 | 100.0 | 100.0 | 100.0 | 100.0 | --          |
| 30:01:00 | 10     | 0.0562 | 100.0 | 100.0 | 100.0 | 100.0 | 100.0 | 100.0 | --          |
| 30:02:00 | 5      | 0.0281 | 100.0 | 99.4  | 100.0 | 99.4  | 83.3  | 100.0 | --          |
| 30:04:00 | 2      | 0.0112 | 100.0 | 98.9  | 0.0   | 100.0 | --    | 98.9  | 03:01 (100) |
| 31:01:00 | 3      | 0.0169 | 100.0 | 99.4  | 100.0 | 99.4  | 75.0  | 100.0 | --          |
| 32:01:00 | 1      | 0.0056 | 100.0 | 100.0 | 100.0 | 100.0 | 100.0 | 100.0 | --          |
| 33:01:00 | 3      | 0.0169 | 100.0 | 99.4  | 66.7  | 100.0 | 100.0 | 99.4  | 30:02 (50)  |
| 33:03:00 | 2      | 0.0112 | 100.0 | 99.4  | 100.0 | 99.4  | 66.7  | 100.0 | --          |
| 34:02:00 | 4      | 0.0225 | 100.0 | 99.4  | 75.0  | 100.0 | 100.0 | 99.4  | 02:01 (100) |
| 36:01:00 | 3      | 0.0169 | 100.0 | 98.3  | 100.0 | 98.3  | 50.0  | 100.0 | --          |

|          |   |        |       |       |       |       |       |       |                |
|----------|---|--------|-------|-------|-------|-------|-------|-------|----------------|
| 66:01:00 | 7 | 0.0393 | 100.0 | 96.1  | 0.0   | 100.0 | --    | 96.1  | 26:01<br>(86)  |
| 66:03:00 | 3 | 0.0169 | 100.0 | 100.0 | 100.0 | 100.0 | 100.0 | 100.0 | --             |
| 68:01:00 | 3 | 0.0169 | 100.0 | 100.0 | 100.0 | 100.0 | 100.0 | 100.0 | --             |
| 68:02:00 | 5 | 0.0281 | 100.0 | 100.0 | 100.0 | 100.0 | 100.0 | 100.0 | --             |
| 74:01:00 | 4 | 0.0225 | 100.0 | 98.3  | 100.0 | 98.3  | 57.1  | 100.0 | --             |
| 74:10:00 | 3 | 0.0169 | 100.0 | 98.3  | 0.0   | 100.0 | --    | 98.3  | 74:01<br>(100) |
| 80:01:00 | 3 | 0.0169 | 100.0 | 100.0 | 100.0 | 100.0 | 100.0 | 100.0 | --             |

HLA-B

|          |   |        |       |       |       |       |       |       |                |
|----------|---|--------|-------|-------|-------|-------|-------|-------|----------------|
| 7:02     | 5 | 0.0431 | 100.0 | 100.0 | 100.0 | 100.0 | 100.0 | 100.0 | --             |
| 8:01     | 0 | 0      | --    | --    | --    | --    | --    | --    | --             |
| 8:01     | 6 | 0.0517 | 100.0 | 99.1  | 83.3  | 100.0 | 100.0 | 99.1  | 42:01<br>(100) |
| 13:02    | 1 | 0.0086 | 100.0 | 99.1  | 0.0   | 100.0 | --    | 99.1  | 14:01<br>(100) |
| 14:01    | 0 | 0      | --    | --    | --    | --    | --    | --    | --             |
| 14:02    | 4 | 0.0345 | 100.0 | 99.1  | 75.0  | 100.0 | 100.0 | 99.1  | 15:10<br>(50)  |
| 14:03    | 0 | 0      | --    | --    | --    | --    | --    | --    | --             |
| 15:01    | 1 | 0.0086 | 100.0 | 99.1  | 100.0 | 99.1  | 50.0  | 100.0 | --             |
| 15:03    | 9 | 0.0776 | 100.0 | 99.1  | 88.9  | 100.0 | 100.0 | 99.1  | 45:01<br>(100) |
| 15:04    | 1 | 0.0086 | 100.0 | 99.1  | 0.0   | 100.0 | --    | 99.1  | 15:01<br>(100) |
| 15:10    | 3 | 0.0259 | 100.0 | 99.1  | 100.0 | 99.1  | 75.0  | 100.0 | --             |
| 15:16    | 2 | 0.0172 | 100.0 | 100.0 | 100.0 | 100.0 | 100.0 | 100.0 | --             |
| 15:17    | 1 | 0.0086 | 100.0 | 100.0 | 100.0 | 100.0 | 100.0 | 100.0 | --             |
| 15:18    | 0 | 0      | --    | --    | --    | --    | --    | --    | --             |
| 15:20    | 1 | 0.0086 | 100.0 | 100.0 | 100.0 | 100.0 | 100.0 | 100.0 | --             |
| 18:01    | 3 | 0.0259 | 100.0 | 99.1  | 66.7  | 100.0 | 100.0 | 99.1  | 44:02<br>(50)  |
| 35:01:00 | 7 | 0.0603 | 100.0 | 96.6  | 100.0 | 96.3  | 60.9  | 100.0 | --             |
| 35:02:00 | 2 | 0.0172 | 100.0 | 99.1  | 50.0  | 100.0 | 100.0 | 99.1  | 35:01<br>(100) |
| 35:03:00 | 5 | 0.0431 | 100.0 | 99.1  | 80.0  | 100.0 | 100.0 | 99.1  | 38:01<br>(100) |
| 35:05:00 | 1 | 0.0086 | 100.0 | 99.1  | 0.0   | 100.0 | --    | 99.1  | 35:01<br>(100) |
| 35:20:00 | 0 | 0      | --    | --    | --    | --    | --    | --    | --             |
| 37:01:00 | 2 | 0.0172 | 100.0 | 100.0 | 100.0 | 100.0 | 100.0 | 100.0 | --             |
| 38:01:00 | 3 | 0.0259 | 100.0 | 98.3  | 100.0 | 98.2  | 60.0  | 100.0 | --             |
| 39:05:00 | 1 | 0.0086 | 100.0 | 99.1  | 100.0 | 99.1  | 50.0  | 100.0 | --             |
| 39:06:00 | 0 | 0      | --    | --    | --    | --    | --    | --    | --             |
| 39:10:00 | 1 | 0.0086 | 100.0 | 99.1  | 0.0   | 100.0 | --    | 99.1  | 38:01<br>(100) |
| 40:01:00 | 0 | 0      | --    | --    | --    | --    | --    | --    | --             |
| 40:04:00 | 0 | 0      | --    | --    | --    | --    | --    | --    | --             |
| 41:01:00 | 4 | 0.0345 | 100.0 | 99.1  | 75.0  | 100.0 | 100.0 | 99.1  | 15:10<br>(50)  |
| 41:02:00 | 0 | 0      | --    | --    | --    | --    | --    | --    | --             |
| 42:01:00 | 8 | 0.0690 | 100.0 | 97.4  | 100.0 | 97.2  | 76.2  | 100.0 | --             |
| 44:02:00 | 4 | 0.0345 | 100.0 | 99.1  | 100.0 | 99.1  | 88.9  | 100.0 | --             |

|          |    |        |       |       |       |       |       |       |                |
|----------|----|--------|-------|-------|-------|-------|-------|-------|----------------|
| 44:03:00 | 6  | 0.0517 | 100.0 | 100.0 | 100.0 | 100.0 | 100.0 | 100.0 | --             |
| 45:01:00 | 11 | 0.0948 | 100.0 | 99.1  | 100.0 | 99.0  | 91.7  | 100.0 | --             |
| 48:02:00 | 0  | 0      | --    | --    | --    | --    | --    | --    | --             |
| 49:01:00 | 3  | 0.0259 | 100.0 | 100.0 | 100.0 | 100.0 | 100.0 | 100.0 | --             |
| 50:01:00 | 0  | 0      | --    | --    | --    | --    | --    | --    | --             |
| 50:02:00 | 0  | 0      | --    | --    | --    | --    | --    | --    | --             |
| 51:01:00 | 6  | 0.0517 | 100.0 | 96.6  | 50.0  | 99.1  | 75.0  | 97.3  | 52:01<br>(67)  |
| 52:01:00 | 4  | 0.0345 | 100.0 | 96.6  | 50.0  | 98.2  | 44.4  | 98.2  | 51:01<br>(50)  |
| 53:01:00 | 4  | 0.0345 | 100.0 | 98.3  | 50.0  | 100.0 | 100.0 | 98.2  | 35:01<br>(100) |
| 57:01:00 | 2  | 0.0172 | 100.0 | 100.0 | 100.0 | 100.0 | 100.0 | 100.0 | --             |
| 57:03:00 | 1  | 0.0086 | 100.0 | 100.0 | 100.0 | 100.0 | 100.0 | 100.0 | --             |
| 58:01:00 | 3  | 0.0259 | 100.0 | 100.0 | 100.0 | 100.0 | 100.0 | 100.0 | --             |
| 81:01:00 | 1  | 0.0086 | 100.0 | 100.0 | 100.0 | 100.0 | 100.0 | 100.0 | --             |
| HLA-C    |    |        |       |       |       |       |       |       |                |
| 1:02     | 3  | 0.0169 | 100.0 | 100.0 | 100.0 | 100.0 | 100.0 | 100.0 | --             |
| 2:02     | 5  | 0.0281 | 100.0 | 99.4  | 80.0  | 100.0 | 100.0 | 99.4  | 02:10<br>(100) |
| 2:10     | 18 | 0.1011 | 100.0 | 99.4  | 100.0 | 99.4  | 94.7  | 100.0 | --             |
| 3:02     | 1  | 0.0056 | 100.0 | 100.0 | 100.0 | 100.0 | 100.0 | 100.0 | --             |
| 3:03     | 3  | 0.0169 | 100.0 | 100.0 | 100.0 | 100.0 | 100.0 | 100.0 | --             |
| 3:04     | 20 | 0.1124 | 100.0 | 98.9  | 100.0 | 98.7  | 90.9  | 100.0 | --             |
| 4:01     | 24 | 0.1348 | 100.0 | 100.0 | 100.0 | 100.0 | 100.0 | 100.0 | --             |
| 5:01     | 6  | 0.0337 | 100.0 | 100.0 | 100.0 | 100.0 | 100.0 | 100.0 | --             |
| 6:02     | 5  | 0.0281 | 100.0 | 100.0 | 100.0 | 100.0 | 100.0 | 100.0 | --             |
| 7:01     | 11 | 0.0618 | 100.0 | 100.0 | 100.0 | 100.0 | 100.0 | 100.0 | --             |
| 7:02     | 8  | 0.0449 | 100.0 | 100.0 | 100.0 | 100.0 | 100.0 | 100.0 | --             |
| 8:02     | 10 | 0.0562 | 100.0 | 99.4  | 90.0  | 100.0 | 100.0 | 99.4  | 03:04<br>(100) |
| 8:04     | 2  | 0.0112 | 100.0 | 100.0 | 100.0 | 100.0 | 100.0 | 100.0 | --             |
| 12:02    | 1  | 0.0056 | 100.0 | 100.0 | 100.0 | 100.0 | 100.0 | 100.0 | --             |
| 12:03    | 8  | 0.0449 | 100.0 | 100.0 | 100.0 | 100.0 | 100.0 | 100.0 | --             |
| 14:02    | 4  | 0.0225 | 100.0 | 100.0 | 100.0 | 100.0 | 100.0 | 100.0 | --             |
| 15:02    | 3  | 0.0169 | 100.0 | 98.3  | 100.0 | 98.3  | 50.0  | 100.0 | --             |
| 15:39    | 2  | 0.0112 | 100.0 | 98.9  | 0.0   | 100.0 | --    | 98.9  | 15:02<br>(100) |
| 16:01    | 15 | 0.0843 | 100.0 | 100.0 | 100.0 | 100.0 | 100.0 | 100.0 | --             |
| 16:02    | 1  | 0.0056 | 100.0 | 99.4  | 0.0   | 100.0 | --    | 99.4  | 15:02<br>(100) |
| 17:01    | 27 | 0.1517 | 100.0 | 99.4  | 96.3  | 100.0 | 100.0 | 99.3  | 03:04<br>(100) |
| 18:01    | 1  | 0.0056 | 100.0 | 100.0 | 100.0 | 100.0 | 100.0 | 100.0 | --             |
| HLA-DRB1 |    |        |       |       |       |       |       |       |                |
| 1:01     | 9  | 0.0506 | 100.0 | 100.0 | 100.0 | 100.0 | 100.0 | 100.0 | --             |
| 1:02     | 13 | 0.0730 | 100.0 | 100.0 | 100.0 | 100.0 | 100.0 | 100.0 | --             |
| 3:01     | 6  | 0.0337 | 100.0 | 98.3  | 83.3  | 98.8  | 71.4  | 99.4  | 11:02<br>(100) |
| 3:02     | 12 | 0.0674 | 100.0 | 100.0 | 100.0 | 100.0 | 100.0 | 100.0 | --             |
| 4:01     | 2  | 0.0112 | 100.0 | 98.9  | 100.0 | 98.9  | 50.0  | 100.0 | --             |

|       |    |        |       |       |       |       |       |       |                                  |
|-------|----|--------|-------|-------|-------|-------|-------|-------|----------------------------------|
| 4:02  | 1  | 0.0056 | 100.0 | 100.0 | 100.0 | 100.0 | 100.0 | 100.0 | --                               |
| 4:04  | 1  | 0.0056 | 100.0 | 100.0 | 100.0 | 100.0 | 100.0 | 100.0 | --                               |
| 4:11  | 1  | 0.0056 | 100.0 | 99.4  | 0.0   | 100.0 | --    | 99.4  | ... (100)<br>04:01               |
| 7:01  | 21 | 0.1180 | 100.0 | 98.3  | 85.7  | 100.0 | 100.0 | 98.1  | (33)                             |
| 8:01  | 2  | 0.0112 | 100.0 | 100.0 | 100.0 | 100.0 | 100.0 | 100.0 | --                               |
| 8:02  | 5  | 0.0281 | 100.0 | 98.9  | 100.0 | 98.8  | 71.4  | 100.0 | --                               |
| 8:04  | 14 | 0.0787 | 100.0 | 98.9  | 92.9  | 99.4  | 92.9  | 99.4  | 08:02<br>(100)<br>04:01<br>(100) |
| 9:01  | 1  | 0.0056 | 100.0 | 99.4  | 0.0   | 100.0 | --    | 99.4  | (100)                            |
| 10:01 | 2  | 0.0112 | 100.0 | 100.0 | 100.0 | 100.0 | 100.0 | 100.0 | --                               |
| 11:01 | 15 | 0.0843 | 100.0 | 95.5  | 100.0 | 95.1  | 65.2  | 100.0 | --                               |
| 11:02 | 5  | 0.0281 | 100.0 | 98.3  | 80.0  | 98.8  | 66.7  | 99.4  | 08:04<br>(100)<br>11:01<br>(100) |
| 11:04 | 6  | 0.0337 | 100.0 | 96.6  | 0.0   | 100.0 | --    | 96.6  | (100)                            |
| 12:01 | 9  | 0.0506 | 100.0 | 100.0 | 100.0 | 100.0 | 100.0 | 100.0 | --                               |
| 12:02 | 2  | 0.0112 | 100.0 | 98.9  | 0.0   | 100.0 | --    | 98.9  | 03:01<br>(100)                   |
| 13:01 | 10 | 0.0562 | 100.0 | 100.0 | 100.0 | 100.0 | 100.0 | 100.0 | --                               |
| 13:02 | 4  | 0.0225 | 100.0 | 100.0 | 100.0 | 100.0 | 100.0 | 100.0 | --                               |
| 13:04 | 3  | 0.0169 | 100.0 | 98.3  | 0.0   | 100.0 | --    | 98.3  | 11:01<br>(67)                    |
| 14:01 | 3  | 0.0169 | 100.0 | 100.0 | 100.0 | 100.0 | 100.0 | 100.0 | --                               |
| 14:02 | 1  | 0.0056 | 100.0 | 99.4  | 100.0 | 99.4  | 50.0  | 100.0 | --                               |
| 14:06 | 1  | 0.0056 | 100.0 | 99.4  | 0.0   | 100.0 | --    | 99.4  | 14:02<br>(100)                   |
| 15:01 | 7  | 0.0393 | 100.0 | 100.0 | 100.0 | 100.0 | 100.0 | 100.0 | --                               |
| 15:03 | 20 | 0.1124 | 100.0 | 99.4  | 100.0 | 99.4  | 95.2  | 100.0 | --                               |
| 16:02 | 2  | 0.0112 | 100.0 | 100.0 | 100.0 | 100.0 | 100.0 | 100.0 | --                               |

<sup>1</sup>: the HLA alleles with more than one copy and non-zero sensitivity in the training are listed. <sup>2</sup><sub>SEP</sub>: CR – call rate. <sup>3</sup><sub>SEP</sub>: ACC – allele accuracy. <sup>4</sup><sub>SEP</sub>: the most likely miscalled allele and the proportion of the most likely miscalled allele in all miscalled alleles

S10. The sensitivity (SEN), specificity (SPE), positive predictive value (PPV) and negative predictive value (NPV) calculated from validation samples for each four-digit HLA allele to UW model.

| Allele <sup>1</sup> | Num.   | Freq.  | CR <sup>2</sup> | ACC <sup>3</sup> | SEN   | SPE   | PPV   | NPV   | Miscall <sup>4</sup> |
|---------------------|--------|--------|-----------------|------------------|-------|-------|-------|-------|----------------------|
|                     | Valid. | Valid. | (%)             | (%)              | (%)   | (%)   | (%)   | (%)   | (%)                  |
| HLA-A               |        |        |                 |                  |       |       |       |       |                      |
| 1:01                | 13     | 0.0445 | 100.0           | 98.6             | 69.2  | 100.0 | 100.0 | 98.6  | 36:01<br>(100)       |
| 1:02                | 1      | 0.0034 | 100.0           | 100.0            | 100.0 | 100.0 | 100.0 | 100.0 | --                   |
| 1:03                | 11     | 0.0377 | 100.0           | 96.2             | 0.0   | 100.0 | --    | 96.2  | 11:01<br>(82)        |
| 2:01                | 40     | 0.1370 | 100.0           | 99.7             | 100.0 | 99.6  | 97.6  | 100.0 | --                   |
| 2:02                | 4      | 0.0137 | 100.0           | 100.0            | 100.0 | 100.0 | 100.0 | 100.0 | --                   |
| 2:05                | 2      | 0.0068 | 100.0           | 99.7             | 100.0 | 99.7  | 80.0  | 100.0 | --                   |

|          |    |        |       |       |       |       |       |       |                |
|----------|----|--------|-------|-------|-------|-------|-------|-------|----------------|
| 2:05     | 1  | 0.0034 | 100.0 | 99.7  | 0.0   | 100.0 | --    | 99.7  | 02:05<br>(50)  |
| 2:11     | 1  | 0.0034 | 100.0 | 99.7  | 0.0   | 100.0 | --    | 99.7  | ... (100)      |
| 3:01     | 25 | 0.0856 | 100.0 | 98.6  | 100.0 | 98.5  | 84.7  | 100.0 | --             |
| 11:01    | 9  | 0.0308 | 100.0 | 96.9  | 100.0 | 96.8  | 48.6  | 100.0 | --             |
| 23:01    | 38 | 0.1301 | 100.0 | 98.3  | 100.0 | 98.0  | 88.4  | 100.0 | --             |
| 23:05    | 5  | 0.0171 | 100.0 | 98.3  | 0.0   | 100.0 | --    | 98.3  | 23:01<br>(100) |
| 24:02:00 | 18 | 0.0616 | 100.0 | 99.7  | 100.0 | 99.6  | 94.7  | 100.0 | --             |
| 24:03:00 | 1  | 0.0034 | 100.0 | 99.7  | 0.0   | 100.0 | --    | 99.7  | 24:02<br>(100) |
| 25:01:00 | 1  | 0.0034 | 100.0 | 100.0 | 100.0 | 100.0 | 100.0 | 100.0 | --             |
| 26:01:00 | 5  | 0.0171 | 100.0 | 97.6  | 100.0 | 97.6  | 41.7  | 100.0 | --             |
| 26:08:00 | 3  | 0.0103 | 100.0 | 99.0  | 0.0   | 100.0 | --    | 99.0  | 26:01<br>(100) |
| 29:02:00 | 7  | 0.0240 | 100.0 | 100.0 | 100.0 | 100.0 | 100.0 | 100.0 | --             |
| 30:01:00 | 16 | 0.0548 | 100.0 | 100.0 | 100.0 | 100.0 | 100.0 | 100.0 | --             |
| 30:02:00 | 13 | 0.0445 | 100.0 | 99.7  | 100.0 | 99.6  | 92.9  | 100.0 | --             |
| 30:04:00 | 2  | 0.0068 | 100.0 | 99.3  | 0.0   | 100.0 | --    | 99.3  | 03:01<br>(100) |
| 31:01:00 | 7  | 0.0240 | 100.0 | 99.3  | 85.7  | 99.6  | 85.7  | 99.6  | 33:03<br>(100) |
| 32:01:00 | 2  | 0.0068 | 100.0 | 99.7  | 100.0 | 99.7  | 80.0  | 100.0 | --             |
| 33:01:00 | 5  | 0.0171 | 100.0 | 99.7  | 80.0  | 100.0 | 100.0 | 99.7  | 30:02<br>(50)  |
| 33:03:00 | 5  | 0.0171 | 100.0 | 99.7  | 100.0 | 99.7  | 83.3  | 100.0 | --             |
| 34:02:00 | 5  | 0.0171 | 100.0 | 99.7  | 80.0  | 100.0 | 100.0 | 99.7  | 02:01<br>(100) |
| 36:01:00 | 6  | 0.0205 | 100.0 | 96.9  | 100.0 | 96.9  | 40.0  | 100.0 | --             |
| 66:01:00 | 7  | 0.0240 | 100.0 | 98.3  | 28.6  | 100.0 | 100.0 | 98.3  | 26:01<br>(80)  |
| 66:03:00 | 5  | 0.0171 | 100.0 | 98.3  | 0.0   | 100.0 | --    | 98.3  | 36:01<br>(100) |
| 68:01:00 | 5  | 0.0171 | 100.0 | 100.0 | 100.0 | 100.0 | 100.0 | 100.0 | --             |
| 68:02:00 | 11 | 0.0377 | 100.0 | 100.0 | 100.0 | 100.0 | 100.0 | 100.0 | --             |
| 74:01:00 | 10 | 0.0342 | 100.0 | 98.3  | 90.0  | 98.6  | 69.2  | 99.6  | 03:01<br>(50)  |
| 74:10:00 | 4  | 0.0137 | 100.0 | 98.6  | 0.0   | 100.0 | --    | 98.6  | 74:01<br>(100) |
| 80:01:00 | 4  | 0.0137 | 100.0 | 100.0 | 100.0 | 100.0 | 100.0 | 100.0 | --             |

---

HLA-B

|       |    |        |       |      |       |       |       |       |                |
|-------|----|--------|-------|------|-------|-------|-------|-------|----------------|
| 7:02  | 17 | 0.0582 | 100.0 | 94.2 | 94.1  | 94.2  | 50.0  | 99.6  | 40:01<br>(50)  |
| 8:01  | 19 | 0.0651 | 100.0 | 95.9 | 36.8  | 100.0 | 100.0 | 95.8  | 40:01<br>(45)  |
| 8:01  | 1  | 0.0034 | 100.0 | 99.7 | 0.0   | 100.0 | --    | 99.7  | 40:01<br>(100) |
| 13:02 | 4  | 0.0137 | 100.0 | 99.0 | 25.0  | 100.0 | 100.0 | 99.0  | 15:10<br>(67)  |
| 14:01 | 1  | 0.0034 | 100.0 | 99.7 | 100.0 | 99.7  | 50.0  | 100.0 | --             |
| 14:02 | 10 | 0.0342 | 100.0 | 99.3 | 90.0  | 99.6  | 94.7  | 99.6  | 15:10<br>(50)  |
| 14:03 | 1  | 0.0034 | 100.0 | 99.7 | 0.0   | 100.0 | --    | 99.7  | 14:02<br>(50)  |
| 15:01 | 4  | 0.0137 | 100.0 | 97.9 | 100.0 | 97.9  | 38.1  | 100.0 | --             |

|          |    |        |       |       |       |       |       |       |                |
|----------|----|--------|-------|-------|-------|-------|-------|-------|----------------|
| 15:03    | 17 | 0.0582 | 100.0 | 95.5  | 29.4  | 99.6  | 83.3  | 95.8  | 07:02<br>(92)  |
| 15:04    | 2  | 0.0068 | 100.0 | 99.3  | 0.0   | 100.0 | --    | 99.3  | 15:01<br>(100) |
| 15:10    | 6  | 0.0205 | 100.0 | 97.6  | 50.0  | 98.6  | 42.9  | 98.9  | 15:01<br>(50)  |
| 15:16    | 5  | 0.0171 | 100.0 | 99.3  | 80.0  | 99.7  | 88.9  | 99.7  | 35:01<br>(100) |
| 15:17    | 3  | 0.0103 | 100.0 | 100.0 | 100.0 | 100.0 | 100.0 | 100.0 | --             |
| 15:18    | 1  | 0.0034 | 100.0 | 100.0 | 100.0 | 100.0 | 100.0 | 100.0 | --             |
| 15:20    | 3  | 0.0103 | 100.0 | 99.0  | 0.0   | 100.0 | --    | 99.0  | 15:01<br>(100) |
| 18:01    | 7  | 0.0240 | 100.0 | 99.0  | 85.7  | 99.3  | 73.3  | 99.6  | 42:01<br>(50)  |
| 35:01:00 | 17 | 0.0582 | 100.0 | 94.9  | 82.4  | 95.6  | 52.8  | 98.9  | 35:02<br>(100) |
| 35:02:00 | 6  | 0.0205 | 100.0 | 98.6  | 100.0 | 98.6  | 60.0  | 100.0 | --             |
| 35:03:00 | 8  | 0.0274 | 100.0 | 97.6  | 37.5  | 99.3  | 60.0  | 98.3  | 35:01<br>(80)  |
| 35:05:00 | 2  | 0.0068 | 100.0 | 99.3  | 0.0   | 100.0 | --    | 99.3  | 35:01<br>(100) |
| 35:20:00 | 1  | 0.0034 | 100.0 | 99.7  | 0.0   | 100.0 | --    | 99.7  | 35:01<br>(50)  |
| 37:01:00 | 5  | 0.0171 | 100.0 | 98.3  | 0.0   | 100.0 | --    | 98.3  | 07:02<br>(100) |
| 38:01:00 | 6  | 0.0205 | 100.0 | 100.0 | 100.0 | 100.0 | 100.0 | 100.0 | --             |
| 39:05:00 | 3  | 0.0103 | 100.0 | 99.0  | 0.0   | 100.0 | --    | 99.0  | 35:01<br>(50)  |
| 39:06:00 | 1  | 0.0034 | 100.0 | 99.7  | 0.0   | 100.0 | --    | 99.7  | ... (100)      |
| 39:10:00 | 2  | 0.0068 | 100.0 | 99.3  | 0.0   | 100.0 | --    | 99.3  | ... (50)       |
| 40:01:00 | 1  | 0.0034 | 100.0 | 97.6  | 100.0 | 97.6  | 11.8  | 100.0 | --             |
| 40:04:00 | 1  | 0.0034 | 100.0 | 99.7  | 0.0   | 100.0 | --    | 99.7  | ... (100)      |
| 41:01:00 | 8  | 0.0274 | 100.0 | 97.9  | 75.0  | 98.6  | 60.0  | 99.3  | 15:10<br>(25)  |
| 41:02:00 | 1  | 0.0034 | 100.0 | 99.7  | 0.0   | 100.0 | --    | 99.7  | 41:01<br>(100) |
| 42:01:00 | 19 | 0.0651 | 100.0 | 96.2  | 84.2  | 97.1  | 64.6  | 98.9  | 15:10<br>(33)  |
| 44:02:00 | 12 | 0.0411 | 100.0 | 99.7  | 100.0 | 99.6  | 92.3  | 100.0 | --             |
| 44:03:00 | 16 | 0.0548 | 100.0 | 98.3  | 100.0 | 98.2  | 77.1  | 100.0 | --             |
| 45:01:00 | 28 | 0.0959 | 100.0 | 95.2  | 50.0  | 100.0 | 100.0 | 95.0  | 42:01<br>(48)  |
| 48:02:00 | 1  | 0.0034 | 100.0 | 100.0 | 100.0 | 100.0 | 100.0 | 100.0 | --             |
| 49:01:00 | 8  | 0.0274 | 100.0 | 99.3  | 87.5  | 99.6  | 93.3  | 99.6  | 44:03<br>(100) |
| 50:01:00 | 2  | 0.0068 | 100.0 | 99.3  | 100.0 | 99.3  | 44.4  | 100.0 | --             |
| 50:02:00 | 1  | 0.0034 | 100.0 | 99.7  | 0.0   | 100.0 | --    | 99.7  | 44:03<br>(100) |
| 51:01:00 | 11 | 0.0377 | 100.0 | 97.3  | 63.6  | 98.6  | 63.6  | 98.6  | 52:01<br>(50)  |
| 52:01:00 | 7  | 0.0240 | 100.0 | 96.6  | 28.6  | 98.2  | 30.8  | 98.2  | 51:01<br>(80)  |
| 53:01:00 | 9  | 0.0308 | 100.0 | 99.3  | 77.8  | 100.0 | 100.0 | 99.3  | 35:01<br>(50)  |
| 57:01:00 | 4  | 0.0137 | 100.0 | 100.0 | 100.0 | 100.0 | 100.0 | 100.0 | --             |
| 57:03:00 | 2  | 0.0068 | 100.0 | 99.7  | 100.0 | 99.7  | 80.0  | 100.0 | --             |
| 58:01:00 | 6  | 0.0205 | 100.0 | 99.3  | 66.7  | 100.0 | 100.0 | 99.3  | 15:03<br>(50)  |

|          |    |        |       |       |       |       |       |       |                    |
|----------|----|--------|-------|-------|-------|-------|-------|-------|--------------------|
| 81:01:00 | 3  | 0.0103 | 100.0 | 99.7  | 66.7  | 100.0 | 100.0 | 99.7  | 14:01<br>(100)     |
| HLA-C    |    |        |       |       |       |       |       |       |                    |
| 1:02     | 4  | 0.0139 | 100.0 | 100.0 | 100.0 | 100.0 | 100.0 | 100.0 | --                 |
| 2:02     | 8  | 0.0278 | 100.0 | 96.2  | 87.5  | 96.4  | 41.2  | 99.6  | 07:02<br>(100)     |
| 2:10     | 22 | 0.0764 | 100.0 | 94.1  | 22.7  | 100.0 | 100.0 | 94.0  | 02:02<br>(59)      |
| 3:02     | 3  | 0.0104 | 100.0 | 100.0 | 100.0 | 100.0 | 100.0 | 100.0 | --                 |
| 3:03     | 4  | 0.0139 | 100.0 | 97.9  | 100.0 | 97.9  | 40.0  | 100.0 | --                 |
| 3:04     | 30 | 0.1042 | 100.0 | 96.5  | 76.7  | 98.8  | 88.5  | 97.3  | 03:03<br>(71)      |
| 4:01     | 46 | 0.1597 | 100.0 | 98.6  | 100.0 | 98.3  | 92.0  | 100.0 | --                 |
| 4:13     | 1  | 0.0035 | 100.0 | 99.7  | 0.0   | 100.0 | --    | 99.7  | 04:01<br>(100)     |
| 5:01     | 14 | 0.0486 | 100.0 | 100.0 | 100.0 | 100.0 | 100.0 | 100.0 | --                 |
| 6:02     | 9  | 0.0312 | 100.0 | 100.0 | 100.0 | 100.0 | 100.0 | 100.0 | --                 |
| 7:01     | 23 | 0.0799 | 100.0 | 99.7  | 95.7  | 100.0 | 100.0 | 99.6  | 07:02<br>(50)      |
| 7:02     | 17 | 0.0590 | 100.0 | 97.9  | 100.0 | 97.8  | 72.3  | 100.0 | --                 |
| 7:04     | 2  | 0.0069 | 100.0 | 100.0 | 100.0 | 100.0 | 100.0 | 100.0 | --                 |
| 8:02     | 13 | 0.0451 | 100.0 | 99.3  | 92.3  | 99.6  | 92.3  | 99.6  | 03:04<br>(100)     |
| 8:04     | 3  | 0.0104 | 100.0 | 99.7  | 66.7  | 100.0 | 100.0 | 99.7  | 03:04<br>(50)      |
| 12:02    | 2  | 0.0069 | 100.0 | 100.0 | 100.0 | 100.0 | 100.0 | 100.0 | --                 |
| 12:03    | 10 | 0.0347 | 100.0 | 100.0 | 100.0 | 100.0 | 100.0 | 100.0 | --                 |
| 14:02    | 5  | 0.0174 | 100.0 | 100.0 | 100.0 | 100.0 | 100.0 | 100.0 | --                 |
| 15:02    | 5  | 0.0174 | 100.0 | 98.3  | 100.0 | 98.2  | 50.0  | 100.0 | --                 |
| 15:04    | 1  | 0.0035 | 100.0 | 99.7  | 0.0   | 100.0 | --    | 99.7  | 15:02<br>(100)     |
| 15:39    | 3  | 0.0104 | 100.0 | 99.0  | 0.0   | 100.0 | --    | 99.0  | 15:02<br>(100)     |
| 16:01    | 21 | 0.0729 | 100.0 | 98.6  | 90.5  | 99.3  | 90.5  | 99.3  | 03:03<br>(50)      |
| 16:02    | 1  | 0.0035 | 100.0 | 99.7  | 0.0   | 100.0 | --    | 99.7  | 15:02<br>(100)     |
| 17:01    | 39 | 0.1354 | 100.0 | 99.3  | 94.9  | 100.0 | 100.0 | 99.2  | 03:04<br>(50)      |
| 18:01    | 2  | 0.0069 | 100.0 | 100.0 | 100.0 | 100.0 | 100.0 | 100.0 | --                 |
| HLA-DRB1 |    |        |       |       |       |       |       |       |                    |
| 1:01     | 14 | 0.0479 | 100.0 | 100.0 | 100.0 | 100.0 | 100.0 | 100.0 | --                 |
| 1:02     | 23 | 0.0788 | 100.0 | 99.7  | 95.7  | 100.0 | 100.0 | 99.6  | ... (100)<br>12:01 |
| 3:01     | 11 | 0.0377 | 100.0 | 97.9  | 81.8  | 98.6  | 66.7  | 99.3  | (50)               |
| 3:02     | 17 | 0.0582 | 100.0 | 100.0 | 100.0 | 100.0 | 100.0 | 100.0 | --                 |
| 4:01     | 4  | 0.0137 | 100.0 | 99.0  | 75.0  | 99.3  | 60.0  | 99.7  | 07:01<br>(50)      |
| 4:02     | 3  | 0.0103 | 100.0 | 100.0 | 100.0 | 100.0 | 100.0 | 100.0 | --                 |
| 4:04     | 2  | 0.0068 | 100.0 | 99.7  | 50.0  | 100.0 | 100.0 | 99.7  | 14:01<br>(50)      |
| 4:05     | 1  | 0.0034 | 100.0 | 99.7  | 100.0 | 99.7  | 66.7  | 100.0 | --                 |
| 4:11     | 3  | 0.0103 | 100.0 | 99.0  | 0.0   | 100.0 | --    | 99.0  | ... (67)<br>10:01  |
| 7:01     | 34 | 0.1164 | 100.0 | 98.6  | 91.2  | 99.6  | 98.4  | 98.8  | (33)               |

|       |    |        |       |       |       |       |       |       |                |
|-------|----|--------|-------|-------|-------|-------|-------|-------|----------------|
| 8:01  | 3  | 0.0103 | 100.0 | 100.0 | 100.0 | 100.0 | 100.0 | 100.0 | --             |
| 8:02  | 9  | 0.0308 | 100.0 | 99.3  | 100.0 | 99.3  | 85.7  | 100.0 | --             |
| 8:04  | 25 | 0.0856 | 100.0 | 96.2  | 60.0  | 99.6  | 93.8  | 96.4  | 11:01<br>(30)  |
| 9:01  | 1  | 0.0034 | 100.0 | 99.7  | 0.0   | 100.0 | --    | 99.7  | 04:01<br>(100) |
| 10:01 | 3  | 0.0103 | 100.0 | 99.7  | 100.0 | 99.7  | 75.0  | 100.0 | --             |
| 11:01 | 27 | 0.0925 | 100.0 | 94.2  | 92.6  | 94.3  | 61.7  | 99.2  | 03:01<br>(50)  |
| 11:02 | 9  | 0.0308 | 100.0 | 97.6  | 33.3  | 99.6  | 75.0  | 97.9  | 14:01<br>(83)  |
| 11:04 | 7  | 0.0240 | 100.0 | 97.6  | 0.0   | 100.0 | --    | 97.6  | 11:01<br>(100) |
| 12:01 | 11 | 0.0377 | 100.0 | 95.9  | 27.3  | 98.6  | 46.2  | 97.2  | 13:01<br>(100) |
| 12:02 | 2  | 0.0068 | 100.0 | 98.3  | 0.0   | 99.0  | 0.0   | 99.3  | 03:01<br>(100) |
| 13:01 | 15 | 0.0514 | 100.0 | 96.2  | 86.7  | 96.8  | 59.1  | 99.3  | 15:01<br>(100) |
| 13:02 | 7  | 0.0240 | 100.0 | 99.3  | 85.7  | 99.6  | 85.7  | 99.6  | 13:01<br>(100) |
| 13:04 | 4  | 0.0137 | 100.0 | 98.6  | 0.0   | 100.0 | --    | 98.6  | 11:01<br>(25)  |
| 13:05 | 1  | 0.0034 | 100.0 | 99.7  | 0.0   | 100.0 | --    | 99.7  | 11:01<br>(100) |
| 14:01 | 4  | 0.0137 | 100.0 | 97.9  | 75.0  | 98.3  | 35.3  | 99.6  | 03:01<br>(100) |
| 14:02 | 3  | 0.0103 | 100.0 | 100.0 | 100.0 | 100.0 | 100.0 | 100.0 | --             |
| 14:06 | 1  | 0.0034 | 100.0 | 100.0 | 100.0 | 100.0 | 100.0 | 100.0 | --             |
| 15:01 | 13 | 0.0445 | 100.0 | 96.9  | 100.0 | 96.8  | 55.3  | 100.0 | --             |
| 15:03 | 31 | 0.1062 | 100.0 | 97.6  | 80.6  | 99.6  | 96.2  | 97.7  | 15:01<br>(100) |
| 16:02 | 4  | 0.0137 | 100.0 | 99.0  | 25.0  | 100.0 | 100.0 | 99.0  | 11:01<br>(100) |

<sup>1</sup>: the HLA alleles with more than one copy and non-zero sensitivity in the training are listed. <sup>2</sup><sub>SEP</sub>: CR – call rate. <sup>3</sup><sub>SEP</sub>: ACC – allele accuracy. <sup>4</sup><sub>SEP</sub>: the most likely miscalled allele and the proportion of the most likely miscalled allele in all miscalled alleles.

S11. Characteristics of HLA-B alleles with low sensitivity, among imputations models.

| HLA-B | Geographic region | NCHR | 1000g |     | UW  |     | 1000g+QUI |     |
|-------|-------------------|------|-------|-----|-----|-----|-----------|-----|
|       |                   |      | SEN   | PPV | SEN | PPV | SEN       | PPV |
| 14:03 | AFR               | 1    | 0     | 0   | 0   | 0   | 0         | 0   |
| 15:04 | NAM               | 2    | 0     | 0   | 0   | 0   | 0         | 0   |
| 15:20 | NAM               | 3    | 0     | 0   | 0   | 0   | 100       | 100 |
| 35:05 | NAM               | 2    | 0     | 0   | 0   | 0   | 0         | 0   |
| 35:20 | NAM/MDE           | 1    | 0     | 0   | 0   | 0   | 0         | 0   |
| 37:01 | EAS               | 5    | 0     | 0   | 0   | 0   | 100       | 100 |
| 39:06 | NAM               | 1    | 100   | 100 | 0   | 0   | 100       | 100 |
| 39:10 | AFR               | 2    | 0     | 0   | 0   | 0   | 0         | 0   |
| 40:04 | NAM               | 1    | 0     | 0   | 0   | 0   | 0         | 0   |
| 41:02 | AFR/EUR           | 1    | 0     | 0   | 0   | 0   | 0         | 0   |
| 50:02 | AFR               | 1    | 0     | 0   | 0   | 0   | 0         | 0   |
| 57:03 | AFR               | 2    | 0     | 0   | 100 | 100 | 100       | 100 |



|       |      |   |      |     |      |      |    |      |
|-------|------|---|------|-----|------|------|----|------|
| 52:01 | COSM | 7 | 28.6 | 100 | 28.6 | 98.2 | 50 | 98.2 |
| 35:03 | EUR  | 8 | 37.5 | 75  | 37.5 | 99.3 | 80 | 100  |
